# Supplementary material
Source: PubMed Central journal article supplement (PMC6857584)
Supplement: jexbio-222-209668-s1.pdf [file jexbio-222-209668-s1.pdf]

Table S1: Raw tension and mass measurements from isolated muscles in solutions of varying tonicity

| <u>Muscle Number</u> | <u>Ringer's concentration (% of normal)</u> | <u>Passive tension at 1.15L<sub>0</sub> (N)</u> | <u>Muscle mass (g)</u> | <u>Tension normalized to 100% condition</u> | <u>Mass normalized to 100% condition</u> |
|----------------------|---------------------------------------------|-------------------------------------------------|------------------------|---------------------------------------------|------------------------------------------|
| <b>1</b>             | <b>100</b>                                  | <b>1.171</b>                                    | <b>4.165</b>           | <b>1.000</b>                                | <b>1.000</b>                             |
|                      | <b>75</b>                                   | <b>1.217</b>                                    | <b>4.278</b>           | <b>1.039</b>                                | <b>1.027</b>                             |
|                      | <b>50</b>                                   | <b>1.320</b>                                    | <b>4.493</b>           | <b>1.127</b>                                | <b>1.079</b>                             |
|                      | <b>25</b>                                   | <b>1.654</b>                                    | <b>4.989</b>           | <b>1.412</b>                                | <b>1.198</b>                             |
| 2                    | 100                                         | 0.876                                           | 3.036                  | 1.000                                       | 1.000                                    |
|                      | 75                                          | 0.885                                           | 3.010                  | 1.011                                       | 0.991                                    |
|                      | 50                                          | 0.976                                           | 3.116                  | 1.114                                       | 1.026                                    |
|                      | 25                                          | 1.246                                           | 3.588                  | 1.422                                       | 1.182                                    |
| <b>3</b>             | <b>100</b>                                  | <b>1.522</b>                                    | <b>3.316</b>           | <b>1.000</b>                                | <b>1.000</b>                             |
|                      | <b>75</b>                                   | <b>1.644</b>                                    | <b>3.354</b>           | <b>1.080</b>                                | <b>1.011</b>                             |
|                      | <b>50</b>                                   | <b>1.746</b>                                    | <b>3.512</b>           | <b>1.147</b>                                | <b>1.059</b>                             |
|                      | <b>25</b>                                   | <b>2.216</b>                                    | <b>3.775</b>           | <b>1.456</b>                                | <b>1.138</b>                             |
| 4                    | 100                                         | 0.513                                           | 3.045                  | 1.000                                       | 1.000                                    |
|                      | 75                                          | 0.561                                           | 3.069                  | 1.093                                       | 1.008                                    |
|                      | 50                                          | 0.636                                           | 3.190                  | 1.240                                       | 1.048                                    |
|                      | 25                                          | 0.796                                           | 3.655                  | 1.551                                       | 1.200                                    |
| <b>5</b>             | <b>100</b>                                  | <b>1.183</b>                                    | <b>3.348</b>           | <b>1.000</b>                                | <b>1.000</b>                             |
|                      | <b>75</b>                                   | <b>1.226</b>                                    | <b>3.356</b>           | <b>1.036</b>                                | <b>1.002</b>                             |
|                      | <b>50</b>                                   | <b>1.391</b>                                    | <b>3.493</b>           | <b>1.176</b>                                | <b>1.043</b>                             |
|                      | <b>25</b>                                   | <b>1.793</b>                                    | <b>3.890</b>           | <b>1.515</b>                                | <b>1.162</b>                             |
| 6                    | 100                                         | 1.466                                           | 3.391                  | 1.000                                       | 1.000                                    |
|                      | 75                                          | 1.597                                           | 3.420                  | 1.089                                       | 1.009                                    |
|                      | 50                                          | 1.717                                           | 3.540                  | 1.171                                       | 1.044                                    |
|                      | 25                                          | 2.033                                           | 3.850                  | 1.387                                       | 1.135                                    |
| <b>7</b>             | <b>100</b>                                  | <b>0.847</b>                                    | <b>3.564</b>           | <b>1.000</b>                                | <b>1.000</b>                             |
|                      | <b>75</b>                                   | <b>0.882</b>                                    | <b>3.634</b>           | <b>1.042</b>                                | <b>1.020</b>                             |
|                      | <b>50</b>                                   | <b>0.948</b>                                    | <b>3.769</b>           | <b>1.119</b>                                | <b>1.058</b>                             |
|                      | <b>25</b>                                   | <b>1.210</b>                                    | <b>4.163</b>           | <b>1.429</b>                                | <b>1.168</b>                             |
